# Supplementary material for: Bridged bisnitramide-substituted furazan-based energetic materials
Source: Royal Society of Chemistry journal article supplement (doi:10.1039/c6ta08055c), 2016-01-01
Supplement: c6ta08055c1.pdf [file c6ta08055c1.pdf]

## Electronic Supplementary Information

### Furazan-based Bisnitramide-bridging Energetic Materials

Jiaheng Zhang,\* Srinivas Dharavath, Lauren A. Mitchell, Damon A. Parrish, and Jean'ne M. Shreeve\*

<sup>a</sup>School of Materials Science and Engineering, Harbin Institute of Technology, Shenzhen, 518055, China, E-mail: jzhang@uidaho.edu

<sup>b</sup>Department of Chemistry, University of Idaho, Moscow, Idaho 83844-2343, United States, E-mail: jshreeve@uidaho.edu

<sup>c</sup>Department of Chemistry, University of Minnesota, Minneapolis, MN 55455, United States

<sup>d</sup>Naval Research Laboratory, 4555 Overlook Avenue, Washington, D.C. 20375, United States

### Table of Contents

|                                                              |        |
|--------------------------------------------------------------|--------|
| 1. DSC plots of compounds <b>3-5, 8, 9, 12</b> and <b>13</b> | S2-S5  |
| 2. X-ray Crystallography detail                              | S5     |
| Table S1                                                     | S5     |
| Figures S1 to S3                                             | S6-S8  |
| 2. Theoretical calculations                                  | S9-S11 |
| Table S2                                                     | S10    |
| 3. References                                                | S11    |

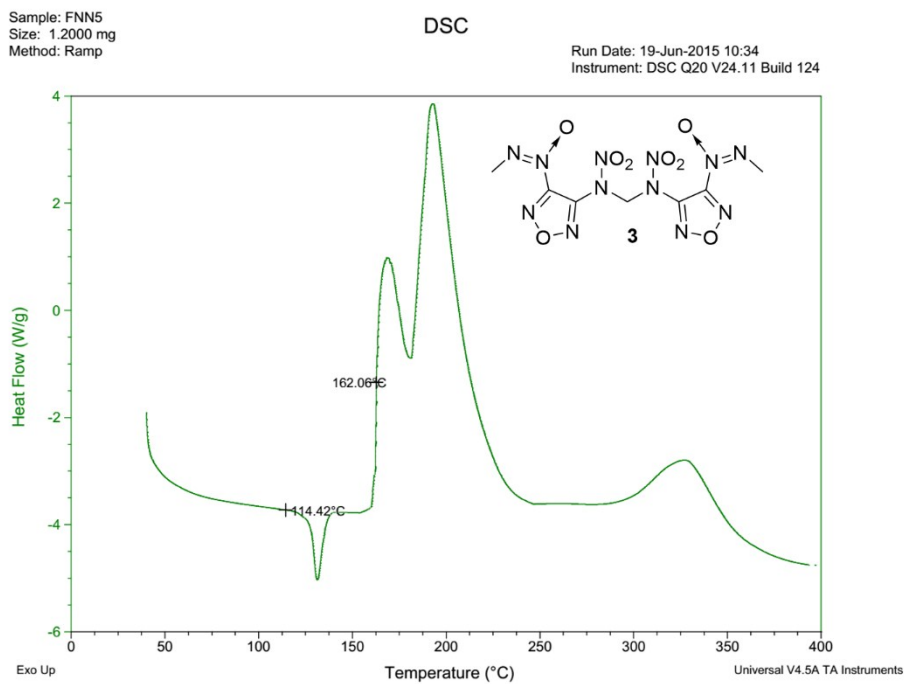

Figure S1. DSC plot of compound 3.

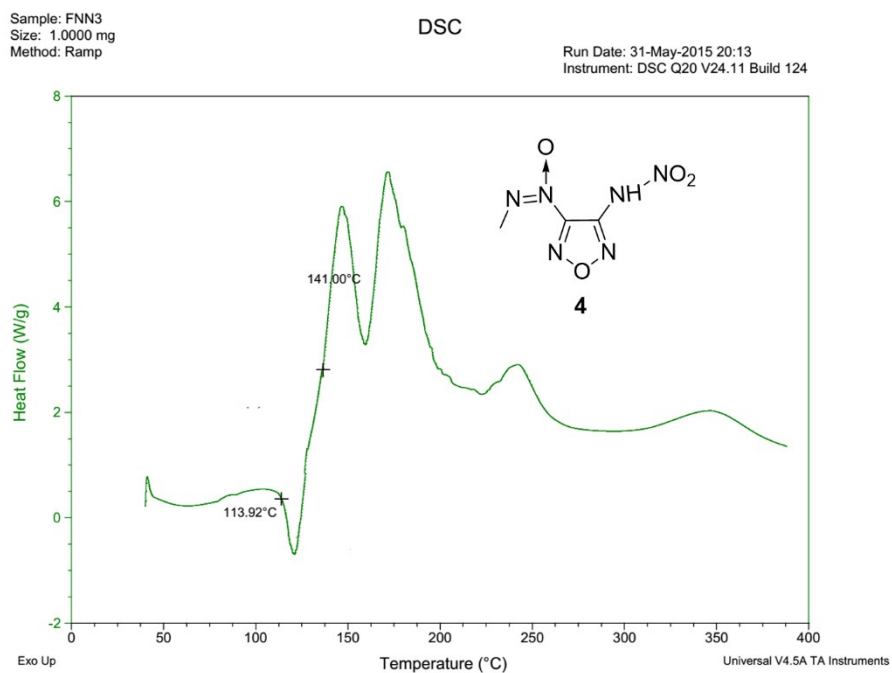

Figure S2. DSC plot of compound 4.

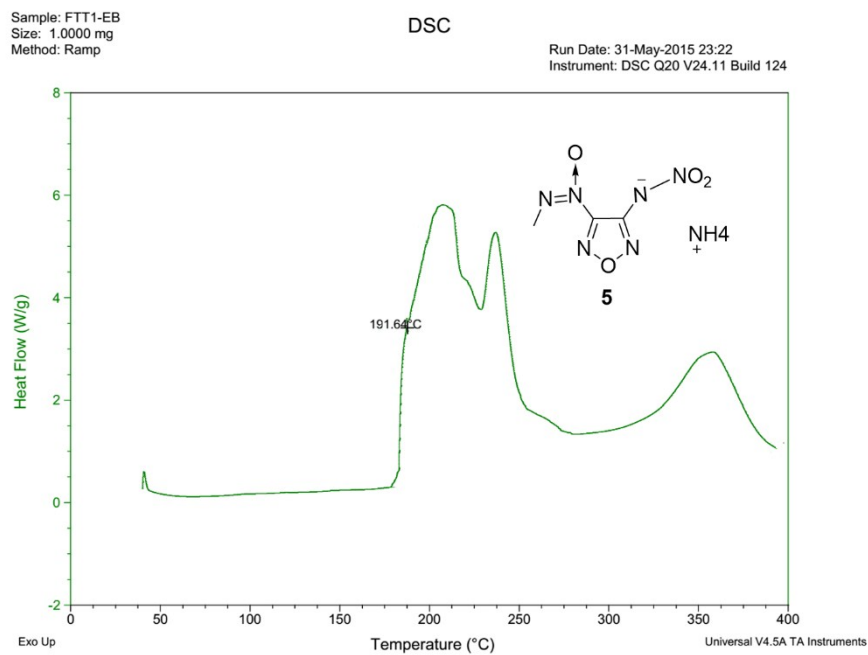

**Figure S3.** DSC plot of compound **5**.

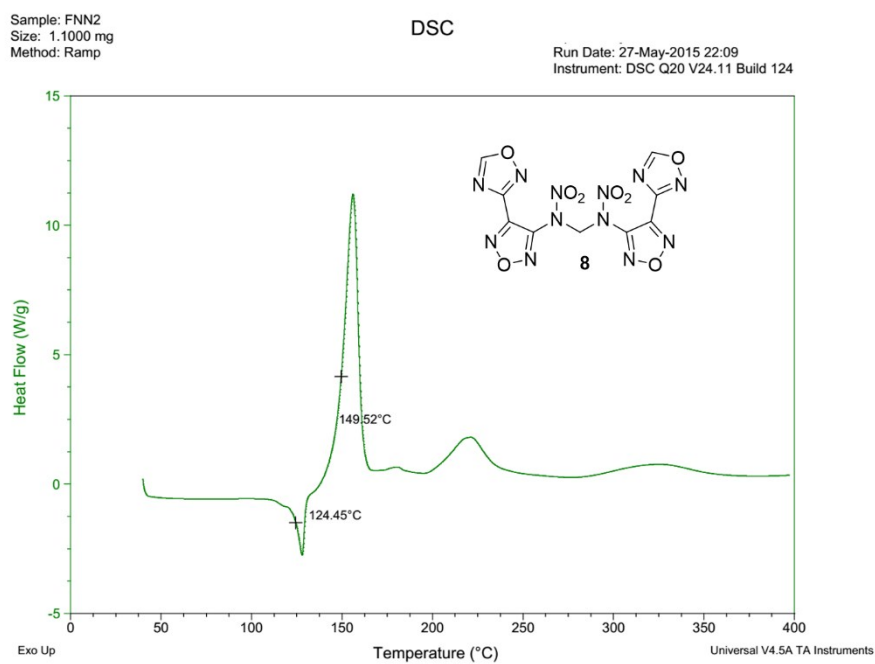

**Figure S4.** DSC plot of compound **8**.

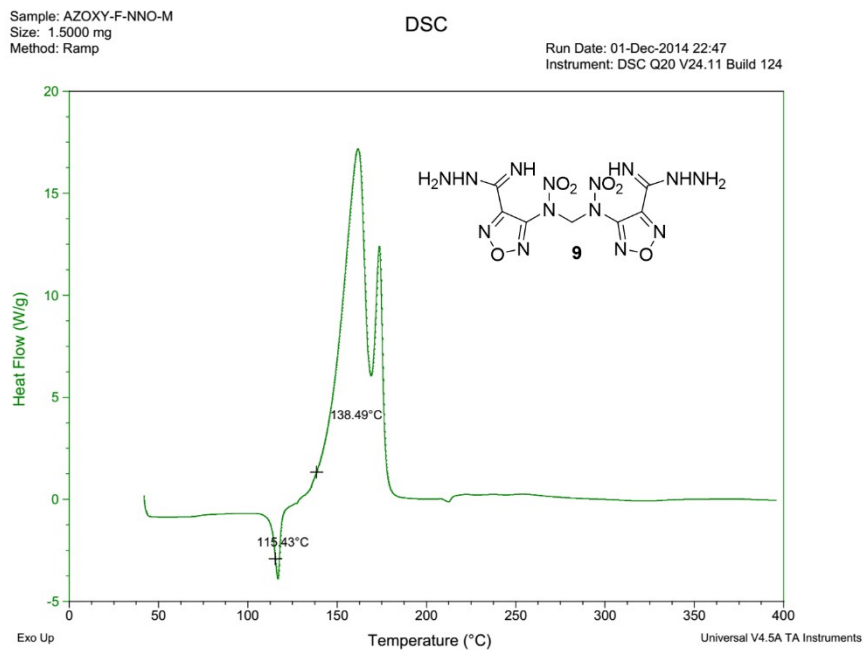

Figure S5. DSC plot of compound **9**.

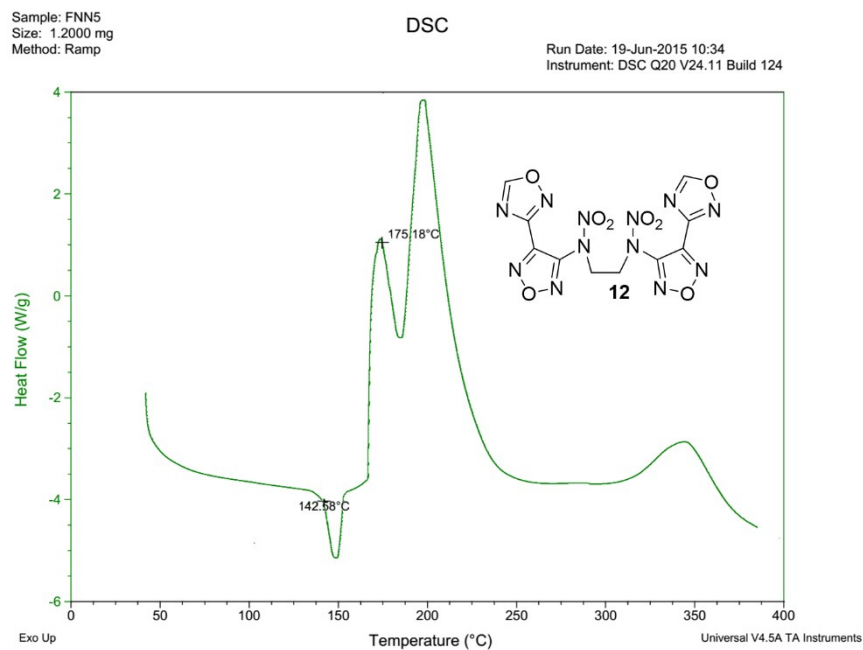

Figure S6. DSC plot of compound **12**.

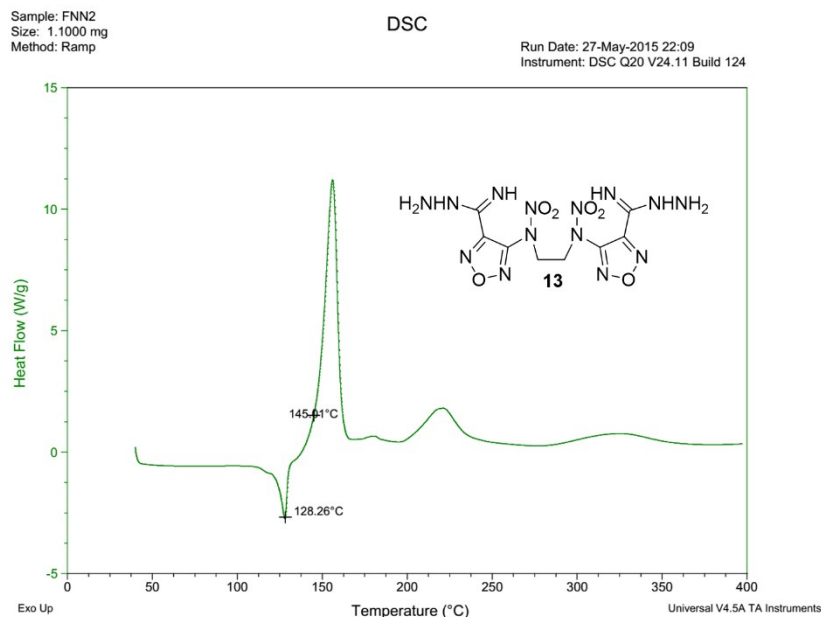

**Figure S7.** DSC plot of compound **13**.

**X-ray Crystallography.** A colorless prism of dimensions 0.187 x 0.091 x 0.087 mm<sup>3</sup> for **3** and a colorless plate crystal of dimensions 0.217 x 0.108 x 0.010 mm<sup>3</sup> for **12** was separately mounted on a MiteGen MicroMesh using a small amount of Cargille immersion oil for the X-ray crystallographic analysis. Data were collected on a Bruker three-circle platform diffractometer equipped with a SMART APEX II CCD detector. The crystals were irradiated using graphite monochromated MoK $\alpha$  radiation ( $\lambda = 0.71073$ ). An Oxford Cobra low temperature device was used to keep the crystals at a constant 150(2) K for **3** during data collection.

**Table 1.** Selected crystal parameters of **3** and **12**.

| Empirical formula                     | C <sub>7</sub> H <sub>8</sub> N <sub>12</sub> O <sub>8</sub> ( <b>3</b> ) | C <sub>10</sub> H <sub>6</sub> N <sub>12</sub> O <sub>8</sub> ( <b>12</b> ) |
|---------------------------------------|---------------------------------------------------------------------------|-----------------------------------------------------------------------------|
| Formula weight                        | 388.21                                                                    | 422.27                                                                      |
| Temperature/K                         | 150                                                                       | 296                                                                         |
| Crystal system                        | orthorhombic                                                              | monoclinic                                                                  |
| Space group                           | Pna2 <sub>1</sub>                                                         | P2 <sub>1</sub> /n                                                          |
| a/Å                                   | 14.3822(16)                                                               | 9.2994(8)                                                                   |
| b/Å                                   | 9.5669(11)                                                                | 8.8927(8)                                                                   |
| c/Å                                   | 11.2707(13)                                                               | 9.8472(9)                                                                   |
| $\alpha$ /°                           | 90                                                                        | 90                                                                          |
| $\beta$ /°                            | 90                                                                        | 100.317(3)                                                                  |
| $\gamma$ /°                           | 90                                                                        | 90                                                                          |
| Volume/Å <sup>3</sup>                 | 1550.8(3)                                                                 | 801.17(1)                                                                   |
| Z                                     | 4                                                                         | 2                                                                           |
| $\rho_{\text{calc}}/\text{g cm}^{-3}$ | 1.663                                                                     | 1.750                                                                       |
| $\mu/\text{mm}^{-1}$                  | 0.150                                                                     | 0.153                                                                       |
| F(000)                                | 792                                                                       | 428                                                                         |
| CCDC number                           | 1474579                                                                   | 1504349                                                                     |

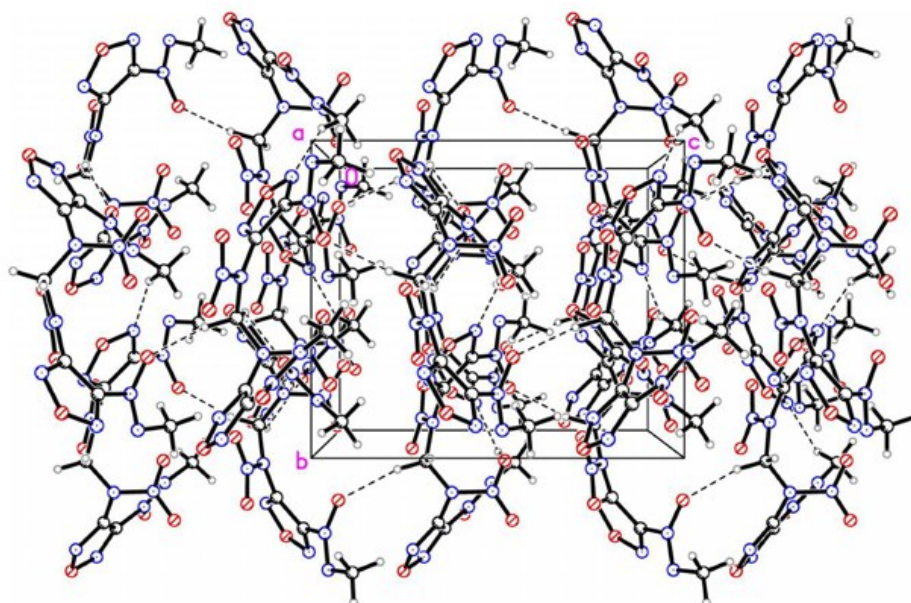

**Figure S8.** Unit cell view for **3** along *a* axis, hydrogen bonds are marked as dotted lines.

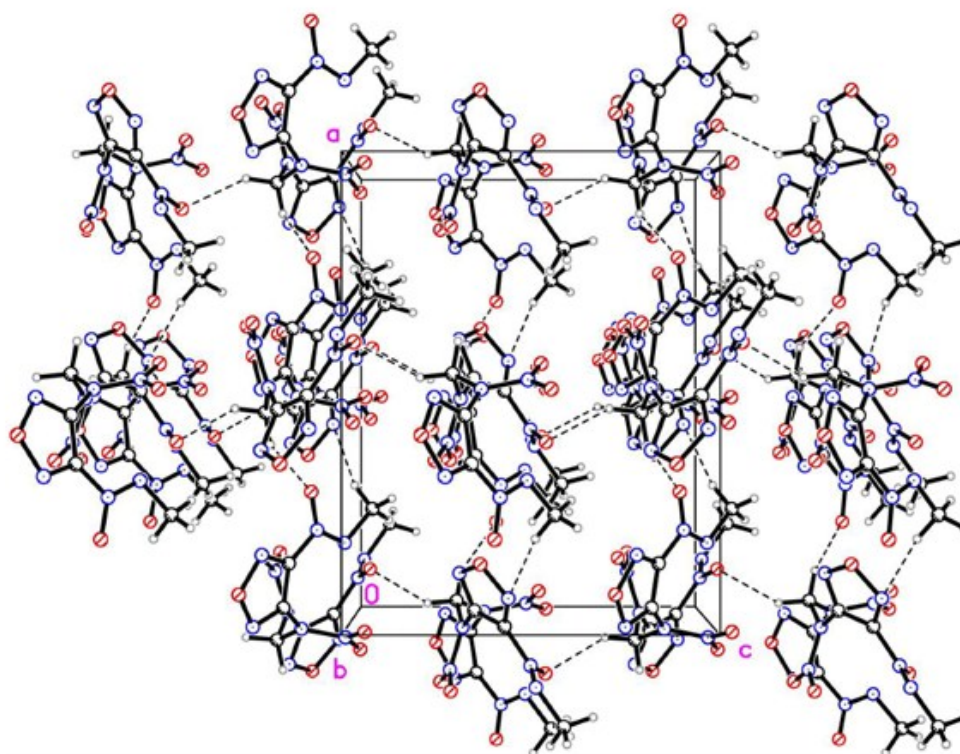

**Figure S9.** Unit cell view for **3** along *b* axis, hydrogen bonds are marked as dotted lines.

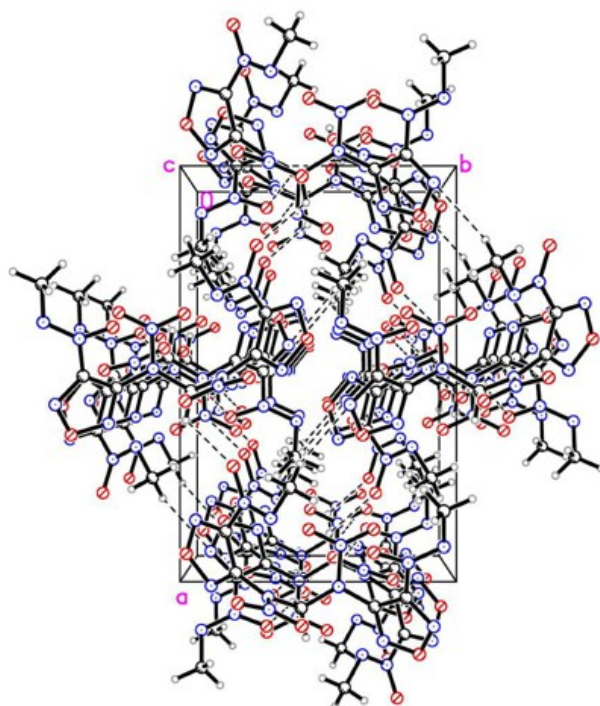

**Figure S10.** Unit cell view for **3** along *c* axis, hydrogen bonds are marked as dotted lines.

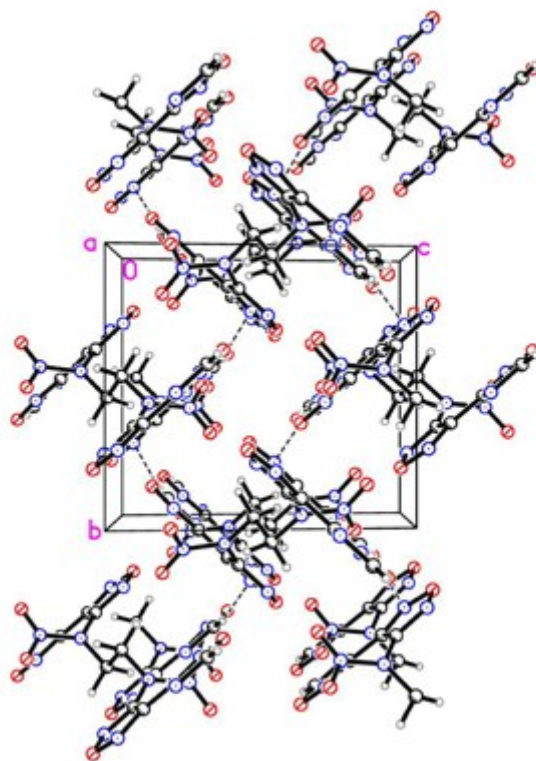

**Figure S11.** Unit cell view for **12** along *a* axis, hydrogen bonds are marked as dotted lines.

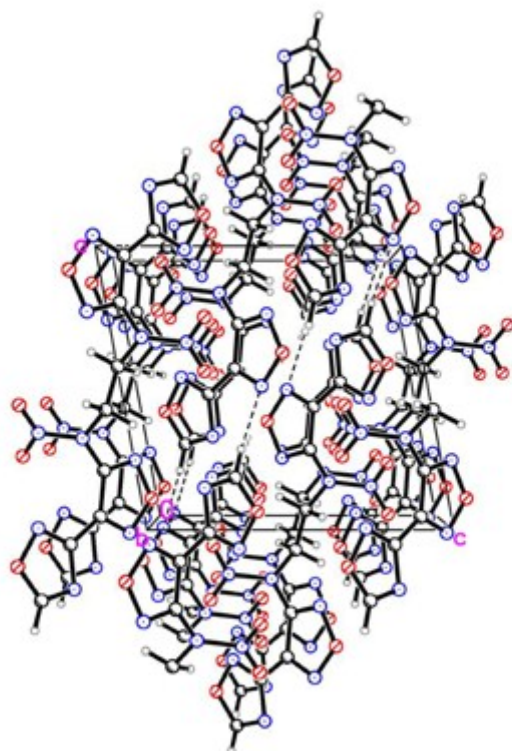

**Figure S12.** Unit cell view for **12** along *b* axis, hydrogen bonds are marked as dotted lines.

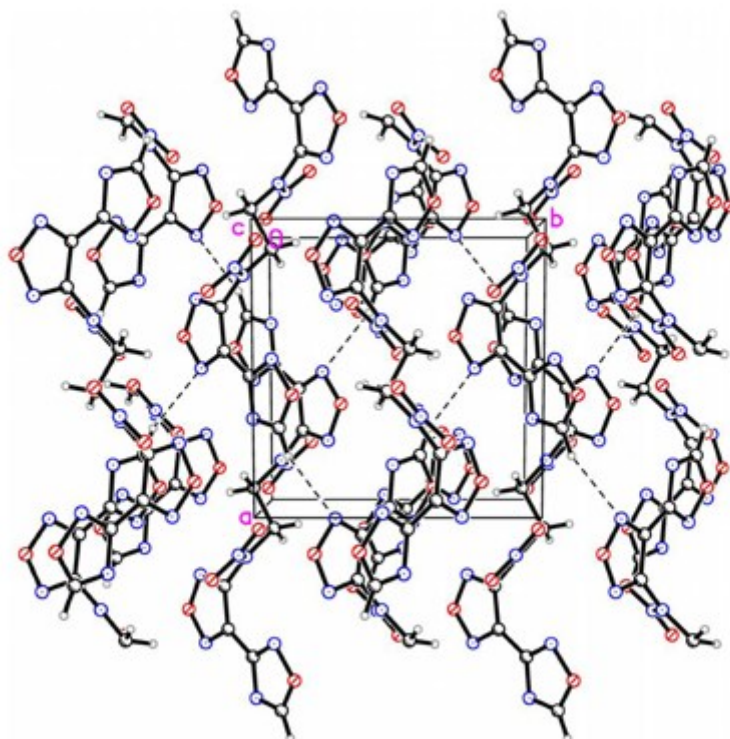

**Figure S13.** Unit cell view for **12** along *c* axis, hydrogen bonds are marked as dotted lines.



## Theoretical calculations

As mentioned in the manuscript, the gas phase heats of formation for all newly prepared neutral compounds and the 4-(methyl-azoxy)-3-nitraminofurazanate anion were obtained using isodesmic reactions (Scheme S1). The geometric optimization and frequency analysis of the structures were calculated using B3LYP function with 6-31+G\*\* basis set.<sup>1</sup> All of the optimized structures were checked to be true local energy minima on the potential energy surface without imaginary frequencies. Single-point energies based on the optimized structures were calculated at the MP2/6-311++G\*\* set.<sup>2</sup> Atomization energies for frame molecules or ions were obtained by employing the G2 *ab initio* method.<sup>3</sup> The conversion of gas phase enthalpies to solid phase values for neutral compounds was done by subtracting the empirical heat of sublimation obtained based on Trouton's rule. For the ionic derivative **5**, the solid phase heat of formation was calculated on the basis of a Born-Haber energy cycle. The heats of formation of other compounds in Scheme S1 were determined from the NIST WebBook.<sup>4</sup>

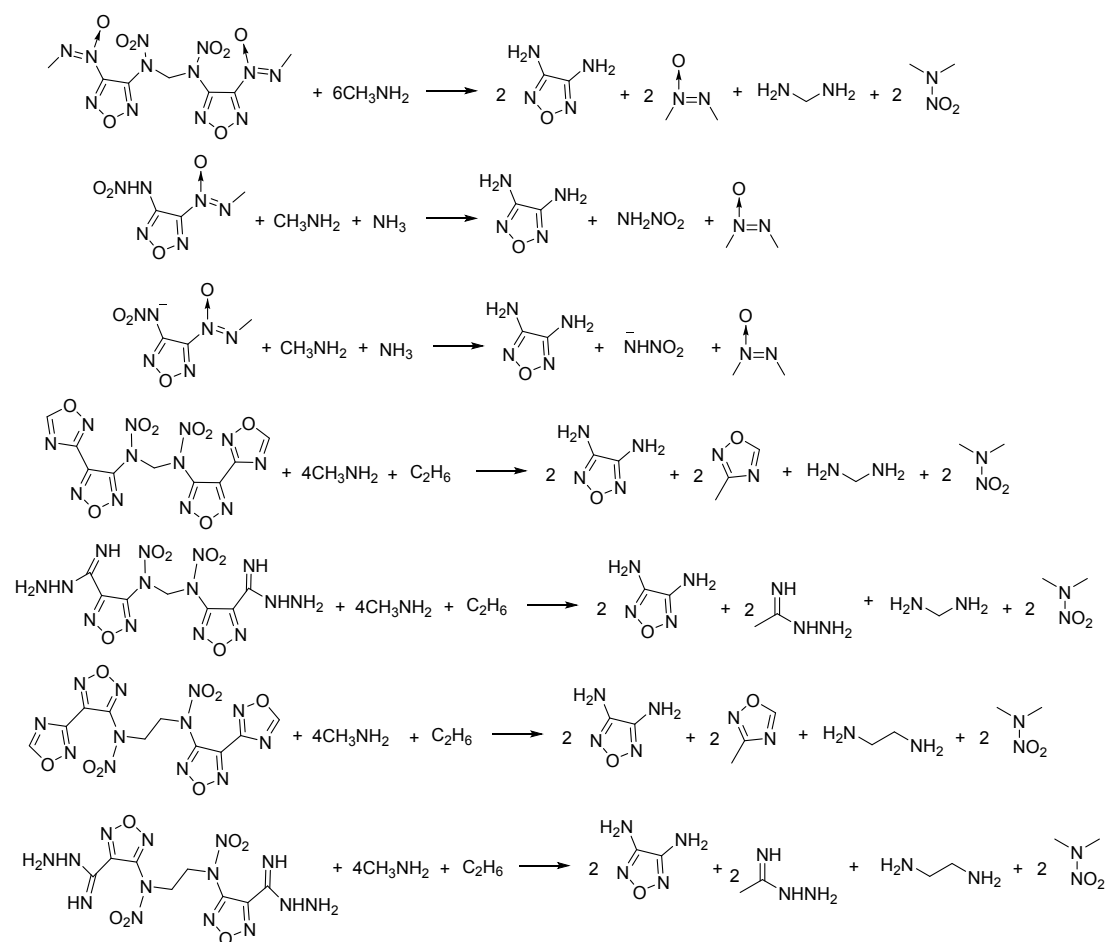

**Scheme S1.** Isodesmic reactions for calculating heats of formation for **3**, **5** and the 4-(methyl-azoxy)-3-nitraminofurazanate anion.

**Table S2.** Enthalpies of the gas-phase species (NIST value and G2 method).<sup>3,4</sup>

| M                           | $\Delta H_f^\circ$ (kJ mol <sup>-1</sup> ) |
|-----------------------------|--------------------------------------------|
| Methylamine                 | -23.5                                      |
| Ammonia                     | -45.9                                      |
| 3,4-Diamino-furazan         | 198.9                                      |
| Nitramide                   | 17.2                                       |
| 1,2-Dimethyldiazene 1-oxide | 62.3                                       |
| Nitramide anion             | -84.0                                      |
| Methanediamine              | -4.5                                       |
| N,N-Dimethylnitramide       | -19.6                                      |
| Ammonium ion                | 626.4                                      |
| Ethane                      | -84.0                                      |
| 3-Methyl-1,2,4-oxadiazole   | 36.9                                       |
| Acetimidohydrazide          | 119.7                                      |
| Ethane-1,2-diamine          | -13.6                                      |

Based on the literature, the heat of sublimation is estimated with Trouton's rule.<sup>5</sup> The solid phase heats of formation of neutral compounds were calculated with equation 1, in which  $T_d$  represents the decomposition temperature.

$$\Delta H_f(s) = \Delta H_f(g) - \Delta H_{\text{sub}} = \Delta H_f(g) - 188[\text{J mol}^{-1} \text{K}^{-1}] \times T_d \quad (1)$$

For energetic salt **5**, the solid-phase heat of formation is calculated on the basis of a Born-Haber energy cycle (Scheme S2).<sup>6</sup> The number is simplified by equation 2:

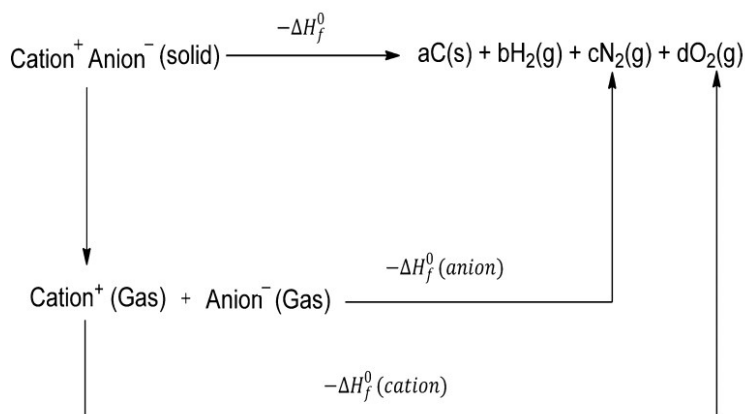**Scheme S2.** Born–Haber Cycle for the formation of energetic salt **4**.

$$\Delta H_f^\circ(\text{salt}, 298 \text{ K}) = \Delta H_f^\circ(\text{cation}, 298\text{K}) + \Delta H_f^\circ(\text{anion}, 298\text{K}) - \Delta H_L \quad (2)$$

in which  $\Delta H_L$  can be predicted by using the formula suggested by Jenkins, et al.<sup>6</sup>(equation 3):

$$\Delta H_L = U_{\text{pot}} + [p(n_M/2 - 2) + q(n_X/2 - 2)]RT \quad (3)$$

In this equation,  $n_M$  and  $n_X$  depend on the nature of the ions  $Mp^+$  and  $Xq^-$ , respectively. The equation for lattice potential energy  $U_{\text{pot}}$  (equation 4) has the form:

$$U_{\text{POT}} [\text{kJ mol}^{-1}] = \gamma(\rho_m/M_m)^{1/3} + \delta \quad (4)$$

where  $\rho_m$  [ $\text{g cm}^{-3}$ ] is the density of the salt,  $M_m$  is the chemical formula mass of the ionic material, and values for  $\gamma$  ( $\text{kJmol}^{-1}\text{cm}$ ) and  $\delta$  ( $\text{kJmol}^{-1}$ ) are assigned literature values.<sup>6</sup> By using the measured room temperature densities, the  $\Delta_f H_{\text{Lat}}$  of **5** was calculated to be  $505.7 \text{ kJ mol}^{-1}$  and the solid phase heat of formation of **5** was obtained as  $346.0 \text{ kJ mol}^{-1}$ .

## References

1. R. G. Parr and W. Yang, *Density Functional Theory of Atoms and Molecules*, Oxford University Press, New York, 1989.
2. Head-Gordon, M; Pople, J. A. MP2 Energy Evaluation by Direct Methods, *Chem. Phys. Lett.* 1988, **153**, 503-506.
3. Curtiss, L. A.; Raghavachari, K.; Trucks, G. W.; Pople, J. A. *J. Chem. Phys.* 1991, **94**, 7221-7230.
4. Linstrom, P. J.; Mallard, W. G.; Eds. NIST Chemistry WebBook, NIST Standard Reference Database, 69, National Institute of Standards and Technology, 2005.
5. a) Trouton, F. *Philos. Mag.* 1884, **18**, 54-57; b) Westwell, M. S.; Searle, M. S.; Wales, D. J.; Williams, D. H. *J. Am. Chem. Soc.* 1995, **117**, 5013-5015.
6. Jenkins, H. D. B.; Tudela, D.; Glasser, L. *Inorg. Chem.* 2002, **41**, 2364-2367.
